# Supplementary material
Source: MDPI journal article supplement (https://www.mdpi.com/2078-1547/14/3/36)
Supplement: s1 [file Planetary Health Assessment and Rubric.xlsx]

## Sheet: Sheet1
Item Number	Assessment Questio	100 points	80 points	60 points	40 points	20 points	0 points
1	Define Planetary Health in your own words (1-2 sentences).	A field focused on characterizing the human health impacts of human caused disruptions of Earth's natural systems	Health of life on Earth (human and non-human) resulting from environmental impacts caused by humans	Health of ecosystems / the non-human environment	Definition focused on conservation implications including loss of biological diversity.	Defintion aligned with that of global or international health	I don't know' or blank or missing or fully incorrect
	Provide up to 5 examples of topics the field focuses on.	5 of these: Climate change and health, invasisve species health impacts, loss of biodiversity and health impacts, land-use change and health impacts, pollution and health impacts, overfishing/hunting and health impacts, socio-economic disparities of the heaalth impacts of environmental change	4 of these: Climate change and health, invasisve species health impacts, loss of biodiversity and health impacts, land-use change and health impacts, pollution and health impacts, overfishing/hunting and health impacts, socio-economic disparities of the heaalth impacts of environmental change	3 of these: Climate change and health, invasisve species health impacts, loss of biodiversity and health impacts, land-use change and health impacts, pollution and health impacts, overfishing/hunting and health impacts, socio-economic disparities of the heaalth impacts of environmental change	2 of these: Climate change and health, invasisve species health impacts, loss of biodiversity and health impacts, land-use change and health impacts, pollution and health impacts, overfishing/hunting and health impacts, socio-economic disparities of the heaalth impacts of environmental change	<2 of these: Climate change and health, invasisve species health impacts, loss of biodiversity and health impacts, land-use change and health impacts, pollution and health impacts, overfishing/hunting and health impacts, socio-economic disparities of the heaalth impacts of environmental change	I don't know' or blank or missing or fully incorrect
	Provide up to 5 reasons why the field of Planetary Health is important.	5 of these: Cultivates evidence-based scholarship on human health-environment linkages, brings together experts to work on interdisciplinary topics in th field, identifies planet-patient co-benefits, shepherds science based evidence into policy, educates clinicians about environmental change, addresses health disparities caused by environmental change, etc/related	4 of these: Cultivates evidence-based scholarship on human health-environment linkages, brings together experts to work on interdisciplinary topics in th field, identifies planet-patient co-benefits, etc/related	3 of these: Cultivates evidence-based scholarship on human health-environment linkages, brings together experts to work on interdisciplinary topics in th field, identifies planet-patient co-benefits, etc/related	2 of these: Cultivates evidence-based scholarship on human health-environment linkages, brings together experts to work on interdisciplinary topics in th field, identifies planet-patient co-benefits, etc/relatedetc/related	<2 of these: Cultivates evidence-based scholarship on human health-environment linkages, brings together experts to work on interdisciplinary topics in th field, identifies planet-patient co-benefits, etc/related	I don't know' or blank or missing or fully incorrect
2	What is the definition of a patient-planetary health co-benefit (1-2 sentences).	Approach/practice that provides benefits to both the person/individual/patient and the environment/planet.		Names benefit as either to the planet/environment or to humans, but not both.			I don't know' or blank or missing or fully incorrect
	Provide up to 5 examples of patient-planetary health co-benefits.	5 of these: Food choices, Activie transport, Reproductive health, Connecting with Nature, Engaging in community, Sustainable drug prescription, Preventative medicine (other examples here: https://www.ncbi.nlm.nih.gov/pmc/articles/PMC8119779/)	4 of these: Food choices, Activie transport, Reproductive health, Connecting with Nature, Engaging in community, Sustainable drug prescription, Preventative medicine (other examples here: https://www.ncbi.nlm.nih.gov/pmc/articles/PMC8119779/)	3 of these: Food choices, Activie transport, Reproductive health, Connecting with Nature, Engaging in community, Sustainable drug prescription, Preventative medicine (other examples here: https://www.ncbi.nlm.nih.gov/pmc/articles/PMC8119779/)	2 of these: Food choices, Activie transport, Reproductive health, Connecting with Nature, Engaging in community, Sustainable drug prescription, Preventative medicine (other examples here: https://www.ncbi.nlm.nih.gov/pmc/articles/PMC8119779/)	<2 of these: Food choices, Activie transport, Reproductive health, Connecting with Nature, Engaging in community, Sustainable drug prescription, Preventative medicine (other examples here: https://www.ncbi.nlm.nih.gov/pmc/articles/PMC8119779/)	I don't know' or blank or missing or fully incorrect
3	Define emerging infectious disease in your own words (1-3 sentences).	Includes 7 of this list: EIDs are those that have recently increased in incidence, impact, or geographic or host range; that are caused by pathogens that have recently evolved; that are newly discovered; or that have recently changed their clinical presentation	Includes 5-6 of this list: EIDs are those that have recently increased in incidence, impact, or geographic or host range; that are caused by pathogens that have recently evolved; that are newly discovered; or that have recently changed their clinical presentation	Includes 3-4 of this list: EIDs are those that have recently increased in incidence, impact, or geographic or host range; that are caused by pathogens that have recently evolved; that are newly discovered; or that have recently changed their clinical presentation	Includes 2 of this list: EIDs are those that have recently increased in incidence, impact, or geographic or host range; that are caused by pathogens that have recently evolved; that are newly discovered; or that have recently changed their clinical presentation	Includes 1 of this list: EIDs are those that have recently increased in incidence, impact, or geographic or host range; that are caused by pathogens that have recently evolved; that are newly discovered; or that have recently changed their clinical presentation	I don't know' or blank or missing or fully incorrect
	Have human emerging infectious diseases increased or decreased globally over the last century in terms of a) total number of emerging infectious diseases, b) different types of emerging infectious diseases, and c) the geographic occurrence of emerging infectious diseases (i.e. where they occur)? Where are they predicted to occur in the future? (6-8 sentences).	Includes all 9 of these points: 1) EIDs have increased in total number since the mid-1900s, 2) with a peak in the 1980s. 3) EIDs that are zoonoses, 4) viral and 5) bacterial have increased in total number over this period. 6) EIDs have primarily been reported in developed nations though this is 7) likely due to reporting bias. EIDs are predicted to occur in regions of 8) high biological diversity…	Includes 7-8 of these points: 1) EIDs have increased in total number since the mid-1900s, 2) with a peak in the 1980s. 3) EIDs that are zoonoses, 4) viral and 5) bacterial have increased in total number over this period. 6) EIDs have primarily been reported in developed nations though this is 7) likely due to reporting bias. EIDs are predicted to occur in regions of 8) high biological diversity w…	Includes 5-6 of these points: 1) EIDs have increased in total number since the mid-1900s, 2) with a peak in the 1980s. 3) EIDs that are zoonoses, 4) viral and 5) bacterial have increased in total number over this period. 6) EIDs have primarily been reported in developed nations though this is 7) likely due to reporting bias. EIDs are predicted to occur in regions of 8) high biological diversity w…	Includes 3-4 of these points: 1) EIDs have increased in total number since the mid-1900s, 2) with a peak in the 1980s. 3) EIDs that are zoonoses, 4) viral and 5) bacterial have increased in total number over this period. 6) EIDs have primarily been reported in developed nations though this is 7) likely due to reporting bias. EIDs are predicted to occur in regions of 8) high biological diversity w…	Includes 1-2 of these points: 1) EIDs have increased in total number since the mid-1900s, 2) with a peak in the 1980s. 3) EIDs that are zoonoses, 4) viral and 5) bacterial have increased in total number over this period. 6) EIDs have primarily been reported in developed nations though this is 7) likely due to reporting bias. EIDs are predicted to occur in regions of 8) high biological diversity w…	I don't know' or blank or missing or fully incorrect
4	Define zoonotic infectious disease in your own words (1-3 sentences)	Disease caused by a pathogen / parasite that transmits from a non-human animal host to a human host	Disease caused by a pathogen / parasite that transmits to humans from a non human host (does not specify animal host)	Disease caused by a pathogen / parasite previously only found in animals but now evident in humans	Disease caused by a pathogen / parasite that transmits between animals and humans - causing disease in both	Disease caused by a pathogen / parasite in animals	I don't know' or blank or missing or fully incorrect
	List up to 5 infectious diseases that are zoonotic.	5 listed correctly from: https://www.ncbi.nlm.nih.gov/pmc/articles/PMC7150356/	4 listed correctly from: https://www.ncbi.nlm.nih.gov/pmc/articles/PMC7150356/	3 listed correctly from: https://www.ncbi.nlm.nih.gov/pmc/articles/PMC7150356/	2 listed correctly from: https://www.ncbi.nlm.nih.gov/pmc/articles/PMC7150356/	1 listed correctly from: https://www.ncbi.nlm.nih.gov/pmc/articles/PMC7150356/	I don't know' or blank or missing or fully incorrect
	Pick one zoonotic infectious disease and describe how it transmits (spreads). between hosts, list the host species it originates in, and the symptoms it causes in humans. (5-8 sentences).	4 of these:1) All primary/secondary/vector hosts correctly named, 2) transmission mode(s) correctly identified, 3) full pathogen lifecycle described including all key stages, 4) all primary human symptons listed.	3 of these:1) All primary/secondary/vector hosts correctly named, 2) transmission mode(s) correctly identified, 3) full pathogen lifecycle described including all key stages, 4) all primary human symptons listed.	2 of these:1) All primary/secondary/vector hosts correctly named, 2) transmission mode(s) correctly identified, 3) full pathogen lifecycle described including all key stages, 4) all primary human symptons listed.	1 of these:1) All primary/secondary/vector hosts correctly named, 2) transmission mode(s) correctly identified, 3) full pathogen lifecycle described including all key stages, 4) all primary human symptons listed.	<1 of these:1) All primary/secondary/vector hosts correctly named, 2) transmission mode(s) correctly identified, 3) full pathogen lifecycle described including all key stages, 4) all primary human symptons listed.	I don't know' or blank or missing or fully incorrect
5	Describe 1 example of an emerging infectious disease in humans and/or wildlife that was the result (in full or in part) of climate change and describe how. (3-6 sentences)	Evidence-based example with clear connection to climate change described clearly and in full. Includes physiological/ecological impacts of change on host and / or pathogen.	Partially correct evidence-based example	Hypothetical example with clear connection to climate change described clearly and in full. Includes physiological/ecological impacts of change on host and / or pathogen.	Partially correct hypothetical example		I don't know' or blank or missing or fully incorrect
	Describe, 1 example of an emerging infectious disease in humans and/or wildlife that was the result (in full or in part) of species invasion/animal trade and describe how. (3-6 sentences)	Evidence-based example with clear connection to invasion/animal trade described clearly and in full. Includes physiological/ecological impacts of change on host and / or pathogen.	Partially correct evidence-based example	Hypothetical example with clear connection to invasion/animal trade described clearly and in full. Includes physiological/ecological impacts of change on host and / or pathogen.	Partially correct hypothetical example		I don't know' or blank or missing or fully incorrect
	Describe, 1 example of an emerging infectious disease in humans and/or wildlife that was the result (in full or in part) of land-use change and desrcibe how. (3-6 sentences)	Evidence-based example with clear connection to land-use change described clearly and in full. Includes physiological/ecological impacts of change on host and / or pathogen.	Partially correct evidence-based example	Hypothetical example with clear connection to land-use change described clearly and in full. Includes physiological/ecological impacts of change on host and / or pathogen.	Partially correct hypothetical example		I don't know' or blank or missing or fully incorrect
6	Describe 1 example that illustrates how an environmental change led to an infectious disease outcome in humans that disproportionately affected certain populations over others. (3-6 sentences)	Evidence-based example with clear description of a disease-environment linkage that had disproportionate effects. Statement of populations impacted and clear description how.	Partially correct evidence-based example	Hypothetical example with clear description of a disease-environment linkage that had disproportionate effects. Statement of populations impacted and clear description how.	Partially correct hypothetical example	Incorrectly attributes environmental channge to ID outcome in a hypothetical example, but an attempt was made.	I don't know' or blank or missing or fully incorrect
7	Provide up to 5 actions that can help to prevent infectious disease emergence in humans resulting from environmental change. Provide one upside and one downside for each action listed.	3 or more of these along with upside/downside: 1) Limit land use change (i.e. fragmentation --> decreased biodiviersity) 2) Decrease illegal idustry operations deep in the jungle (i.e. human exposure to wildlife) 3) Limit industrial waste (i.e. decreasing biodiversity) 4) Reduce impact of climate change (i.e. decreasing biodiversity/shifting vector threats) 5)	2 correct reasons given along with upside/downside. OR 3 actions without updside/downside.	1 correct reason given along with upside/downside. OR 2 actions without upside/downside.	Multiple incorrect reasons given, but an attempt was made. OR 1 correct action without upside/downside.	Single incorrect reason given, an attempt was made.	I don't know' or blank or missing or fully incorrect
8	Do you believe covid-19 originated in a lab or natural setting? Offer up to 3 reasons to support your answer.	3 or more of these with short explanation: 1) Lab: Lack of transparency from Chinese government regarding data. 2) Lab: The Wuhan lab was working on respiratory viruses before the pandemic 3) Lab: There are multiple historical examples of Lab Acquired Infections with different viruses from labs. 4) Natural: Zoonotic events have happened frequently in envrionments of high contact with wildlife, su…	Describes 2 reasons from the listed options with a reasonable explanation for each. OR 3 reasons without any explanation.	Describes 1 reason from the listed options with a reasonable explanation. OR 2 Reasons without any explanation.	1 reason without any explanation.	Ancillary reasons that do not answer the questions, but an attempt was made.	I don't know' or blank or missing or fully incorrect
9	The premise of planetary health is that human health and well-being over the long term depends on the health and well-being of the earth and all of its living and non-living natural systems. Please reflect on how you feel personally about the state of our planet’s health today and subsequent impact on human health and well-being. Are you optimistic, hopeful, pessimistic, unsure, frustrated, etc? …						I don't know' or blank or missing or fully incorrect
